# Supplementary material for: High performance nonvolatile transistor memories of pentacene using the electrets of star-branched p-type polymers and their donor–acceptor blends
Source: Royal Society of Chemistry journal article supplement (doi:10.1039/c3tc31840k), 2013-11-12
Supplement: c3tc31840k.pdf [file c3tc31840k.pdf]

## Supporting Information

### High Performance Nonvolatile Transistor Memories of Pentacene Using the Electrets of Star-branched P-type Polymers and Their Donor/Acceptor Blends

*Yu-Cheng Chiu,<sup>1‡</sup> Tzu-Ying Chen,<sup>1‡</sup> Chu-Chen Chueh,<sup>1</sup> Hung-Yu Chang,<sup>1</sup> Kenji Sugiyama,<sup>2</sup>*

*Yu-Jane Sheng,<sup>1</sup> Akira Hirao,<sup>3</sup> and Wen-Chang Chen<sup>1\*</sup>*

<sup>1</sup> Department of Chemical Engineering, National Taiwan University, Taipei, 10617 Taiwan

<sup>2</sup> Department of Chemical Science and Technology, Hosei University, Tokyo, 102-8160

Japan

<sup>3</sup> Department of Organic and Polymeric Materials, Tokyo Institute of Technology,

Ookayama, Meguro-ku, Tokyo 226-0026, Japan

‡ Contributed equally to this work.

\*To whom all correspondence should be addressed.

\*Email: (W.-C.C.) [chenwc@ntu.edu.tw](mailto:chenwc@ntu.edu.tw)

**Table S1.** Summary of the capacitance and dielectric constant of various substrates.

|                      | Film thickness<br>(nm) | $C_{\text{poly,ave}}$<br>(nF/cm <sup>2</sup> ) | Dielectric<br>constant | $C_{\text{Total,ave}}$<br>(nF/cm <sup>2</sup> ) |
|----------------------|------------------------|------------------------------------------------|------------------------|-------------------------------------------------|
| P(StFl) <sub>1</sub> | 49.25                  | 68.04                                          | 3.62                   | 22.89                                           |
| P(StFl) <sub>3</sub> | 47.10                  | 64.69                                          | 3.44                   | 22.50                                           |
| P(StFl) <sub>4</sub> | 50.10                  | 57.87                                          | 3.28                   | 21.61                                           |

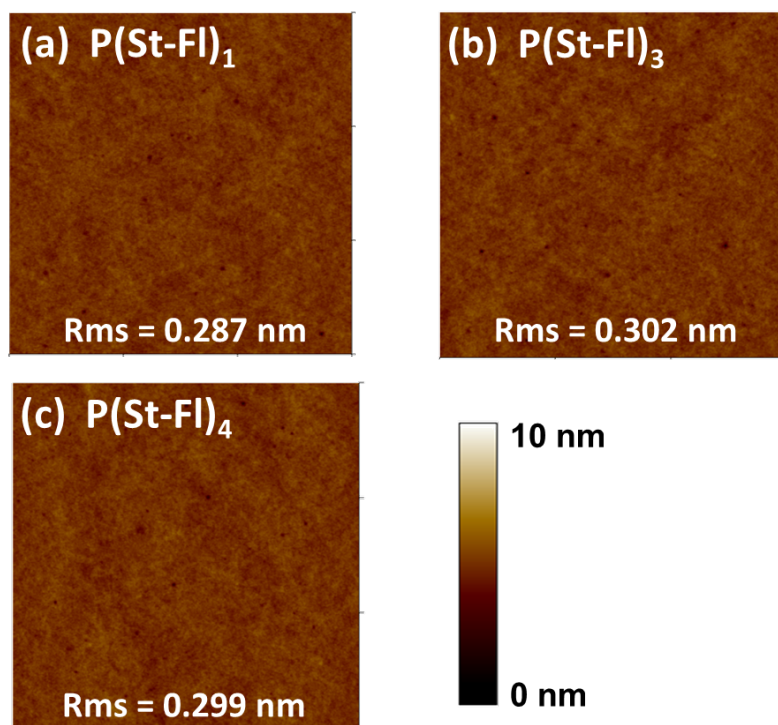

**Figure S1.** AFM topographies of (a) P(StFl)<sub>1</sub>, (b)P(StFl)<sub>3</sub> and (c) P(StFl)<sub>4</sub> spin-coated on bare SiO<sub>2</sub> substrates on 1.5μm x 1.5μm areas.

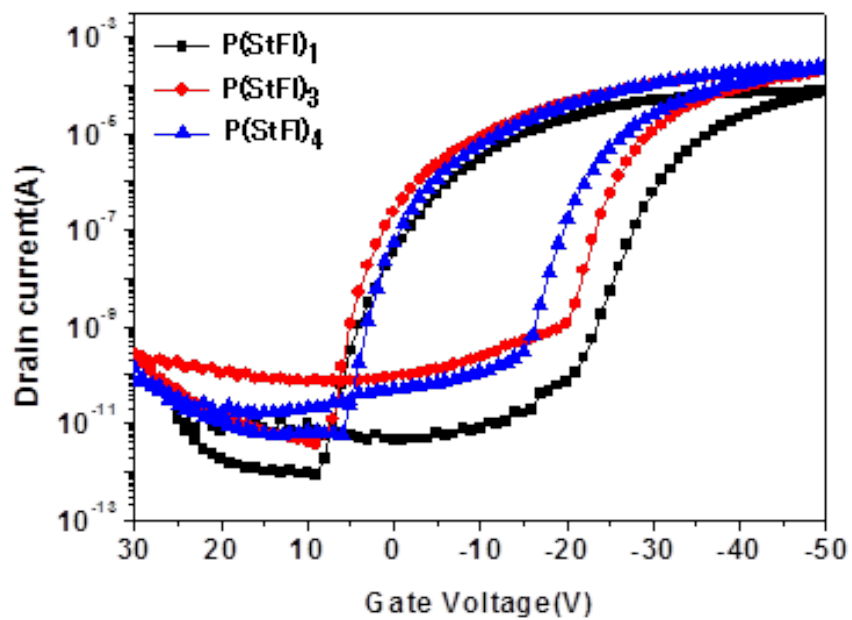

**Figure S2.** Sequential dual gate voltage sweeps of P(StFI)<sub>n</sub> from 30 to -50 V after writing process (50 V, 1s).

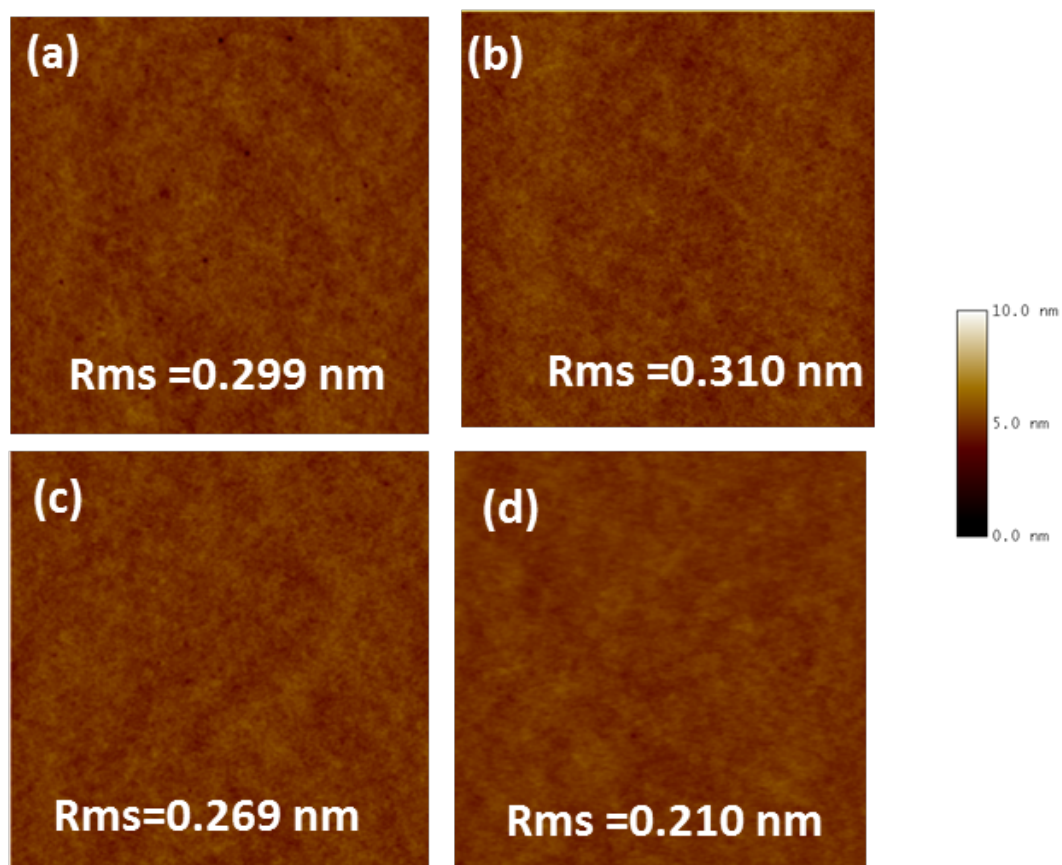

**Figure S3.** AFM topographies of (a) P(StFl)<sub>4</sub>, (b) 1% PC<sub>61</sub>BM/P(StFl)<sub>4</sub>, (c) 3% PC<sub>61</sub>BM/P(StFl)<sub>4</sub>, and (d) 5% PC<sub>61</sub>BM/P(StFl)<sub>4</sub> spin-coated on bare SiO<sub>2</sub> substrates on 3 μm x 3 μm areas.

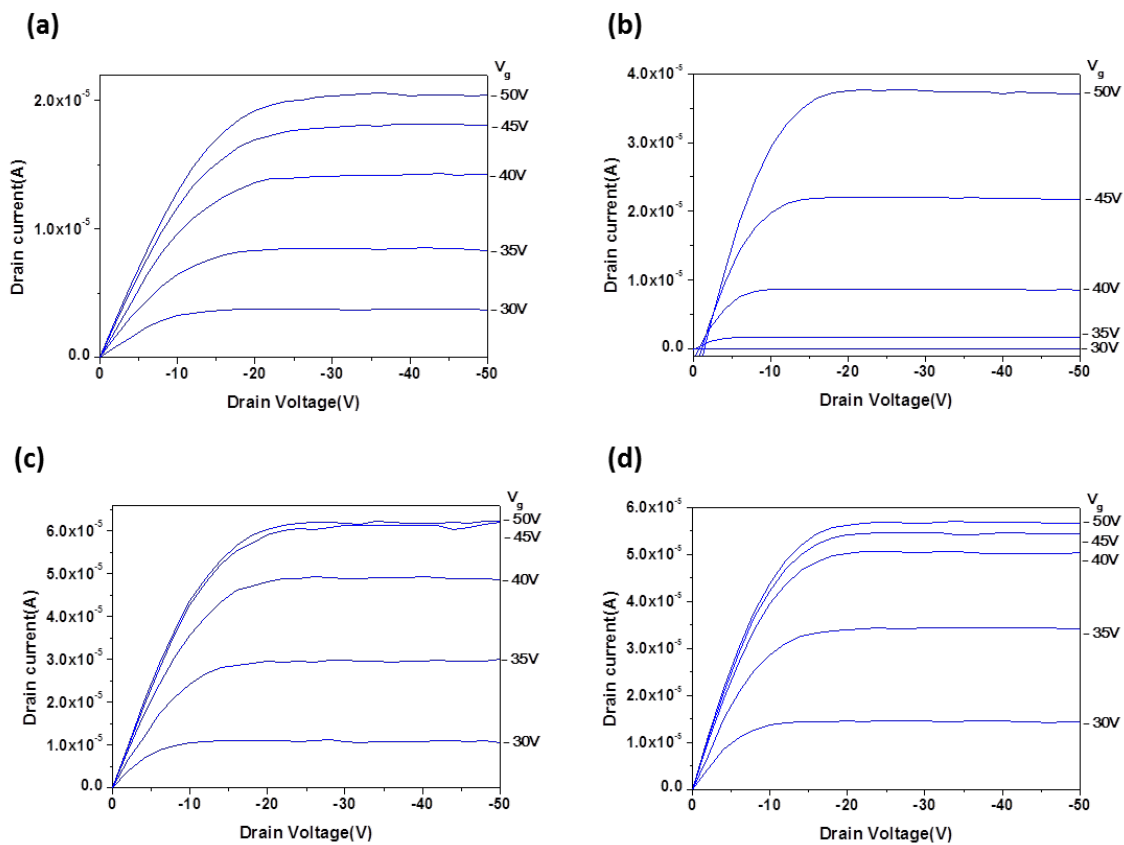

**Figure S4.** Output characteristics of pentacene OFET memory devices using the electrets of

(a) P(StFl)<sub>4</sub>, (b) 1% PC<sub>61</sub>BM/P(StFl)<sub>4</sub>, (c) 3% PC<sub>61</sub>BM/P(StFl)<sub>4</sub>, and (d) 5%

PC<sub>61</sub>BM/P(StFl)<sub>4</sub>.

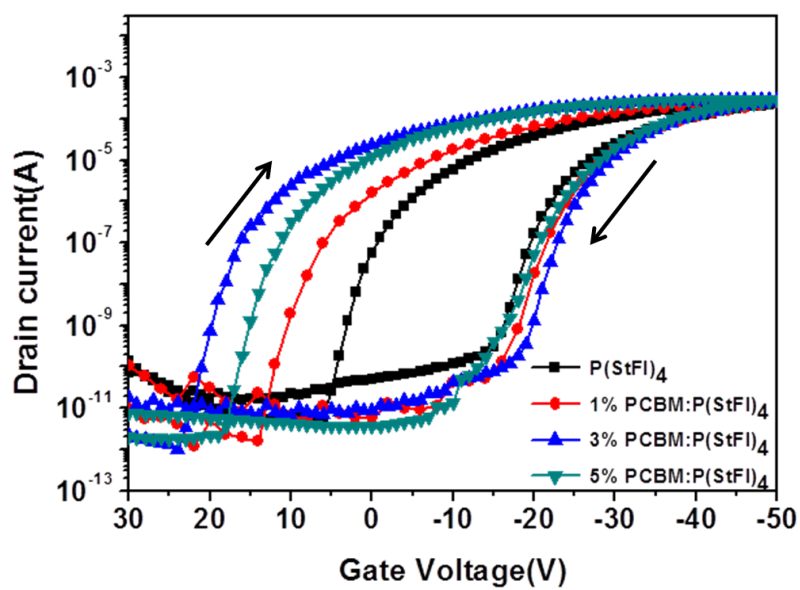

**Figure S5.** Sequential dual gate voltage sweeps of P(StFl)<sub>4</sub> and their blends from 30 to -35 V after writing process (50 V, 1s).

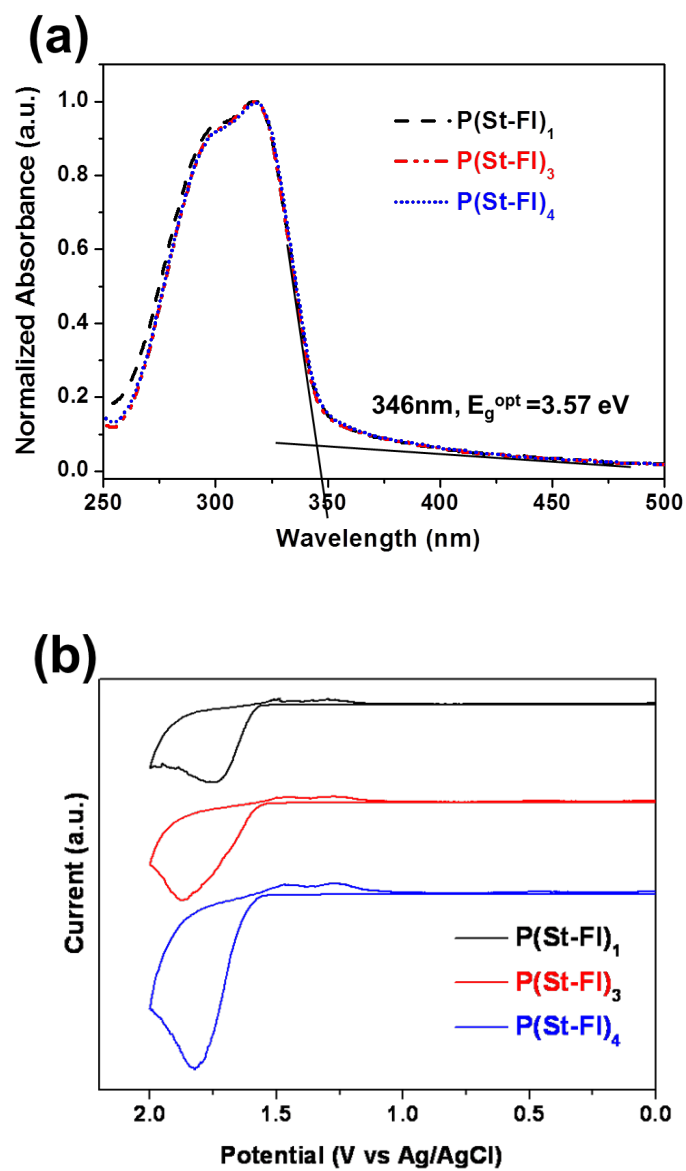

**Figure S6.** (a) Optical absorption spectra of the P(StFI)<sub>n</sub> (n=1,3,4) thin films. (b) Cyclic voltammograms of P(StFI)<sub>n</sub> (n=1,3,4) in 0.1 M TBAP/acetonitrile solution.

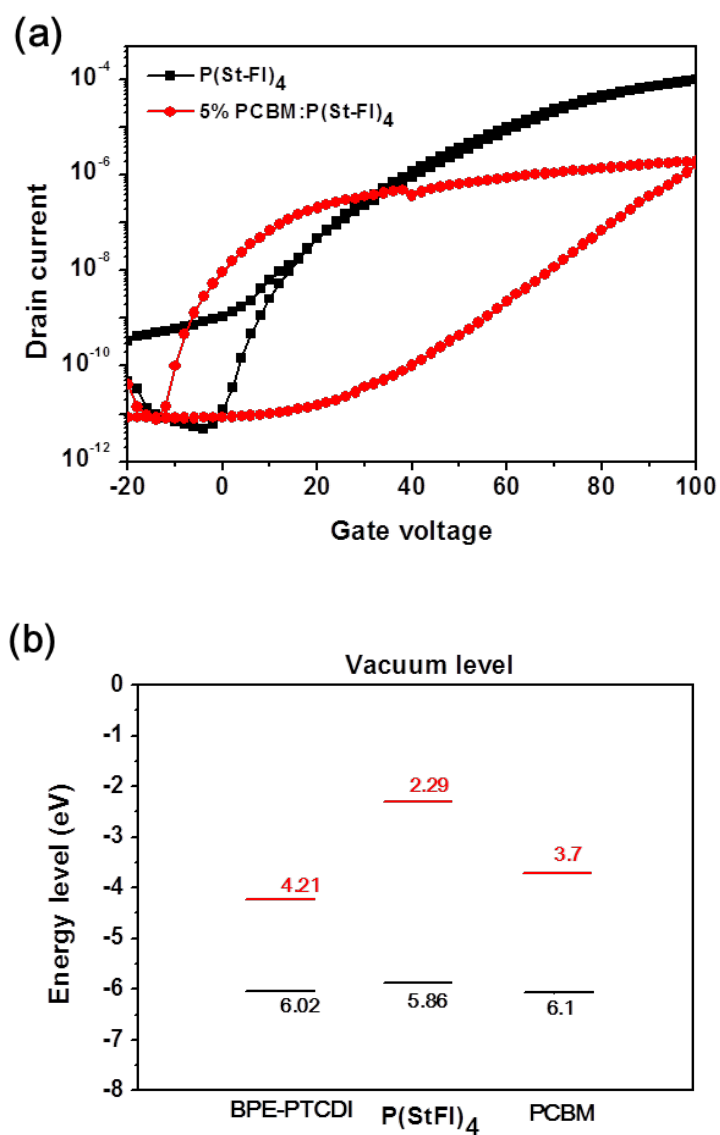

**Figure S7.** (a) Transfer curve in the initial state of the BPE-PTCDI-based OFET memory device with  $P(\text{StFI})_4$  dielectric as compared with the  $\text{PC}_{61}\text{BM}$  blends. (b) Energy-band diagram of BPE-PTCDI, polymer  $P(\text{StFI})_4$ , and  $\text{PC}_{61}\text{BM}$ .
